# Supplementary material
Source: PubMed Central journal article supplement (PMC3329114)
Supplement: ismej2011165x3.pdf [file ismej2011165x3.pdf]

dsrB

| Site | shannon | simpson | S.obs | S.chao1 | se.chao1 | S.ACE | se.ACE |
|------|---------|---------|-------|---------|----------|-------|--------|
| 1    | 2.87    | 0.924   | 47    | 60.2    | 14.39    | 64.82 | 4.31   |
| 2    | 1.7     | 0.609   | 40    | 49.33   | 16.49    | 45.17 | 3.1    |
| 3    | 2.35    | 0.846   | 43    | 49.88   | 6.82     | 53.69 | 3.68   |
| 4    | 1.94    | 0.736   | 45    | 75.33   | 43.99    | 62.97 | 4.12   |
| 5    | 2.89    | 0.916   | 51    | 57.88   | 6.82     | 59.49 | 3.72   |
| 6    | 3.17    | 0.935   | 67    | 102     | 49.82    | 80.37 | 4.47   |
| 7    | 3.01    | 0.893   | 70    | 85.6    | 16.43    | 92.37 | 4.63   |
| 8    | 3.21    | 0.929   | 67    | 76.17   | 9.73     | 75.23 | 4.24   |
| 9    | 2.68    | 0.87    | 63    | 69.6    | 6.04     | 77.86 | 4.57   |
| 10   | 2.47    | 0.852   | 39    | 40      | 3.4      | 41.73 | 2.81   |

mcrA

| Site | shannon | simpson | S.obs | S.chao1 | se.chao1 | S.ACE | se.ACE |
|------|---------|---------|-------|---------|----------|-------|--------|
| 1    | 1.513   | 0.706   | 13    | 13      | NaN      | 13    | 1.519  |
| 2    | 0.902   | 0.406   | 11    | 11      | 0        | 11    | 1.651  |
| 3    | 1.578   | 0.662   | 15    | 15      | NaN      | 15.76 | 1.56   |
| 4    | 1.388   | 0.571   | 15    | 15      | NaN      | 15    | 0.966  |
| 5    | 1.27    | 0.514   | 14    | 14      | NaN      | 14    | 0.964  |
| 6    | 1.311   | 0.537   | 15    | 15      | NaN      | 15    | 0.966  |
| 7    | 1.309   | 0.537   | 15    | 15      | NaN      | 15    | 1.317  |
| 8    | 1.542   | 0.65    | 15    | 15      | NaN      | 15    | 0.966  |
| 9    | 1.501   | 0.63    | 16    | 17      | NaN      | NaN   | NaN    |
| 10   | 2.095   | 0.831   | 15    | 15      | NaN      | NaN   | NaN    |

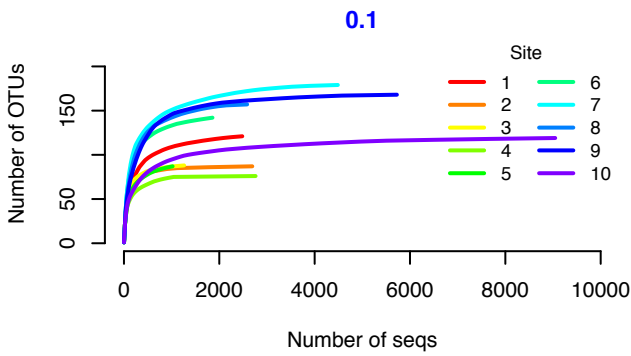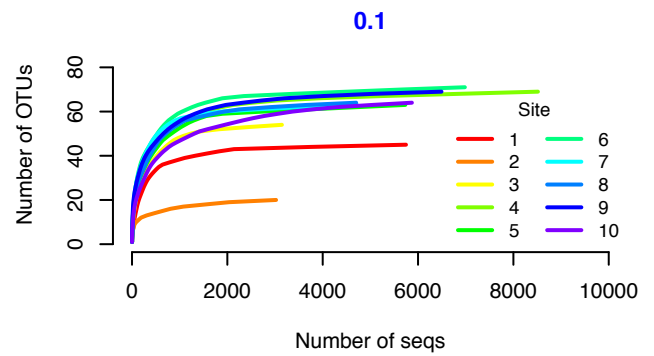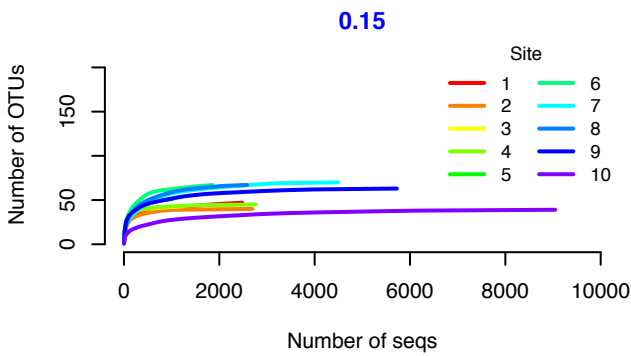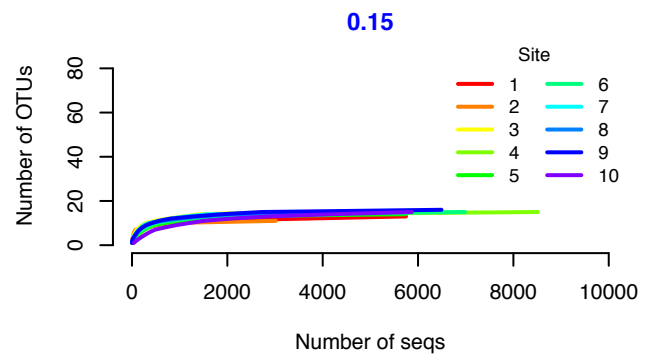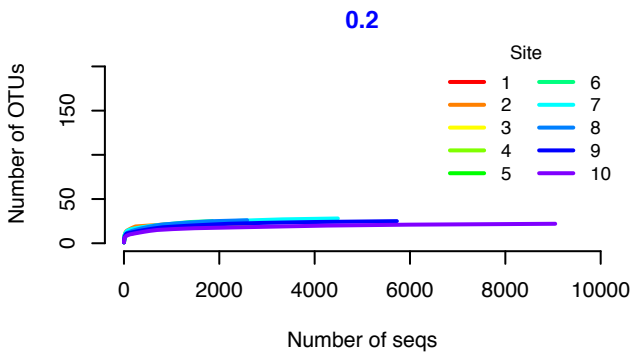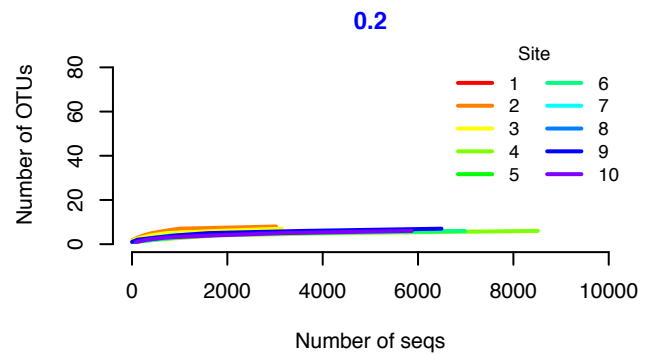

Figure S3.
