# Supplementary material
Source: PubMed Central journal article supplement (PMC3329114)

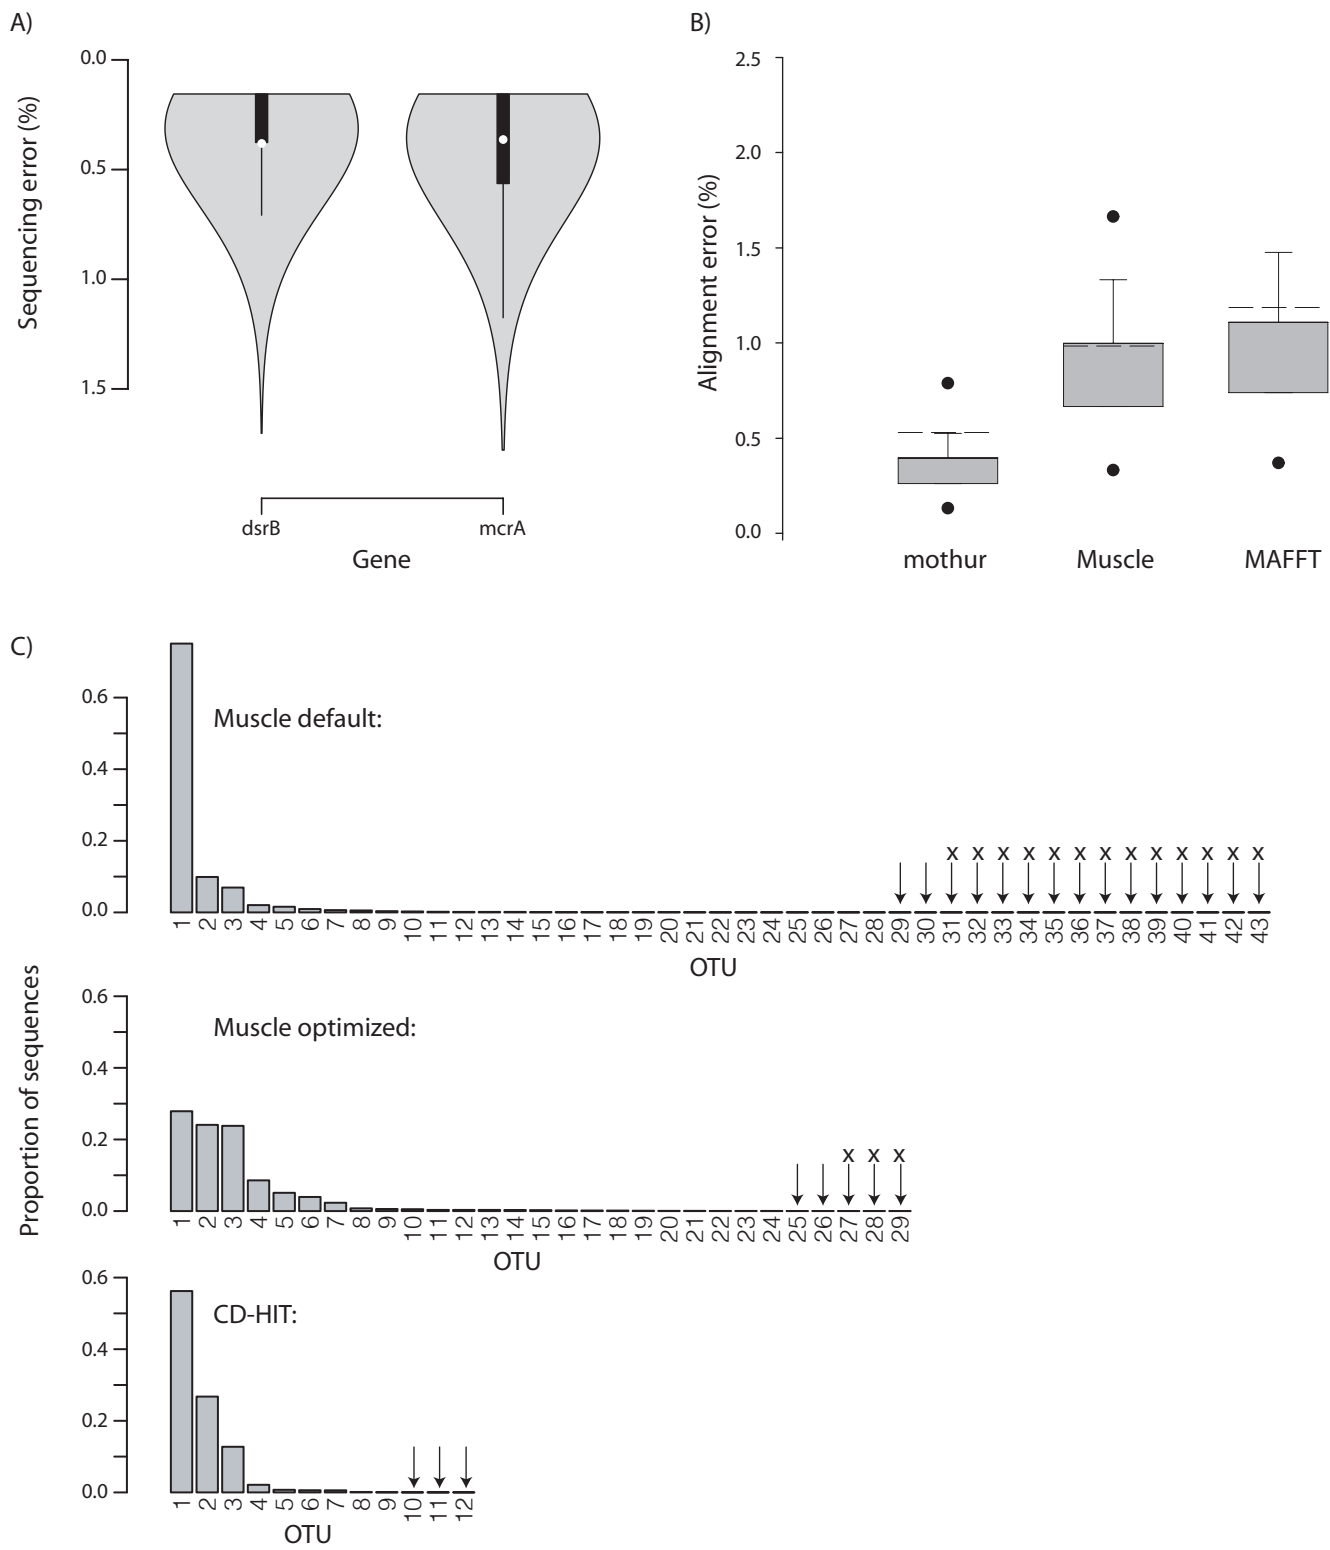

Figure S1.

Supplement: ismej2011165x1.pdf [file ismej2011165x1.pdf]

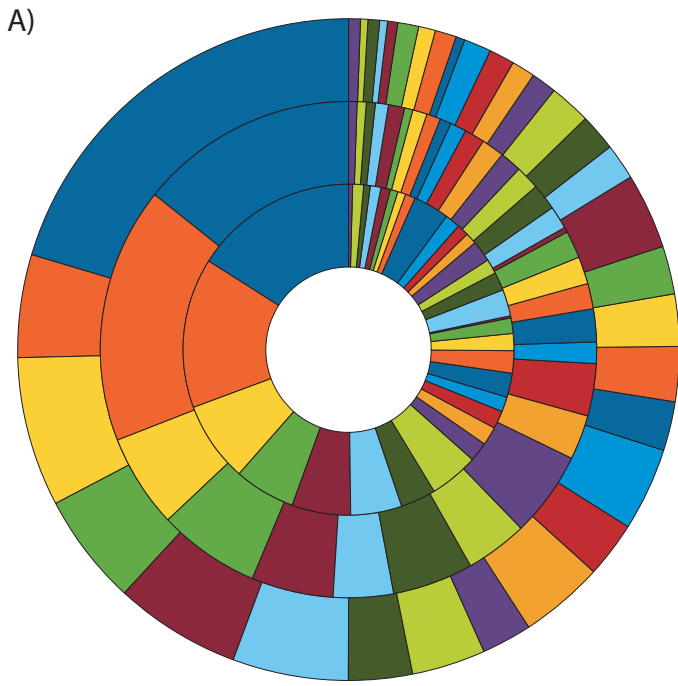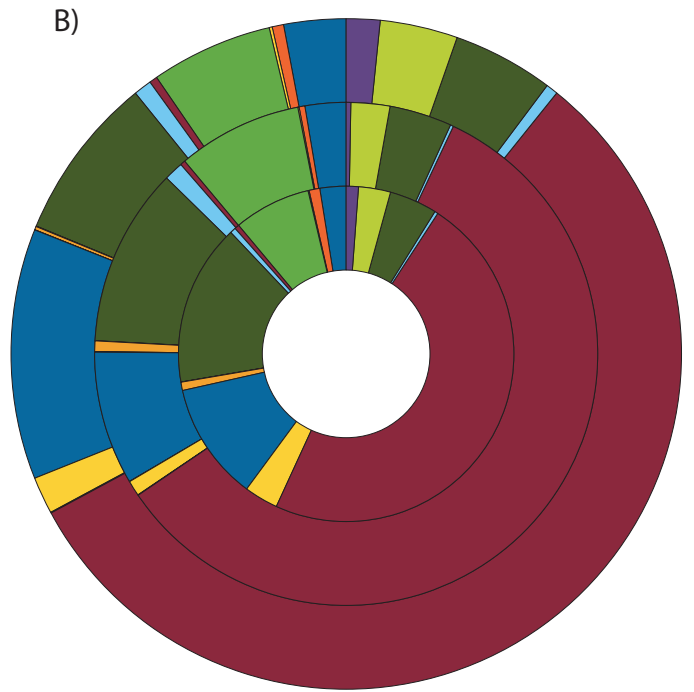

Figure S2.

Supplement: ismej2011165x2.pdf [file ismej2011165x2.pdf]
